# Supplementary material for: A Nucleus-Encoded Chloroplast Protein YL1 Is Involved in Chloroplast Development and Efficient Biogenesis of Chloroplast ATP Synthase in Rice
Source: PubMed Central journal article supplement (PMC5009372; doi:10.1038/srep32295), 2016-09-02
Supplement: srep32295-s1.pdf [file srep32295-s1.pdf]

# **A Nucleus-Encoded Chloroplast Protein YL1 Is Involved in Chloroplast Development and Efficient Biogenesis of Chloroplast ATP Synthase in Rice**

Fei Chen<sup>1,\*</sup>, Guojun Dong<sup>2,\*</sup>, Limin Wu<sup>1</sup>, Fang Wang<sup>3</sup>, Xingzheng Yang<sup>1</sup>, Xiaohui Ma<sup>1</sup>, Haili Wang<sup>1</sup>, Jiahuan Wu<sup>1</sup>, Yanli Zhang<sup>1</sup>, Huizhong Wang<sup>1</sup>, Qian Qian<sup>2,#</sup> and Yanchun Yu<sup>1,#</sup>

<sup>1</sup>College of Life and Environmental Sciences, Hangzhou Normal University, Hangzhou 310036, China

<sup>2</sup>State Key Laboratory for Rice Biology, China National Rice Research Institute, Hangzhou 310006, Zhejiang, China

<sup>3</sup>Institute of Insect Sciences, Zhejiang University, Hangzhou 310058, China

#Correspondence authors.

E-mails: [yycy@hznu.edu.cn](mailto:yycy@hznu.edu.cn) and [qianqian188@hotmail.com](mailto:qianqian188@hotmail.com).

## Supplemental Figure S1

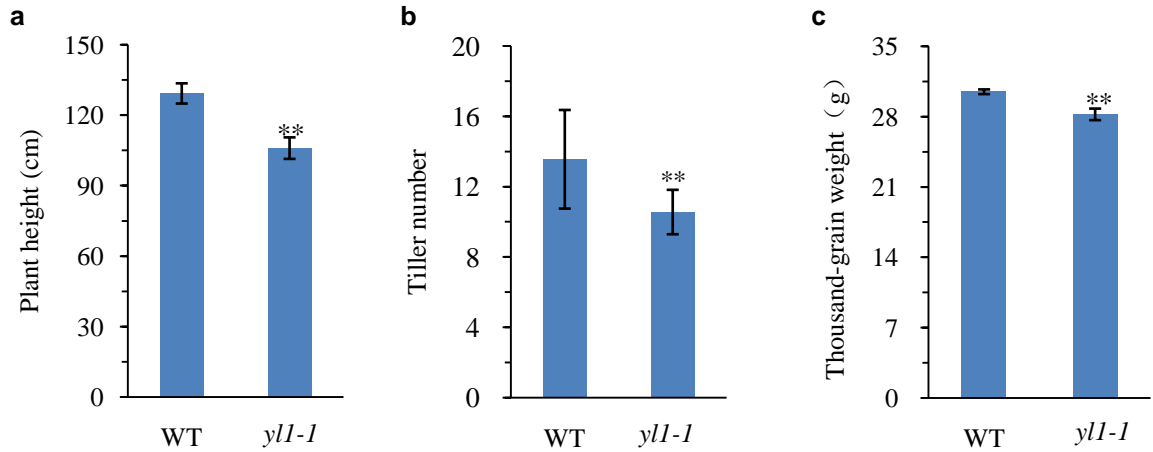

**Supplemental Figure S1.** Comparison of tiller number per plant (a), seed setting ratio (b), and 1,000-grain weight (c) between wild-type and *yll-1* mutant plants. Data in (a)-(c) were measured from plants grown within 60 × 60 cm spacing in field. All the data are means ± SD (n = 10). \*\*, P<0.05.

## Supplemental Figure S2

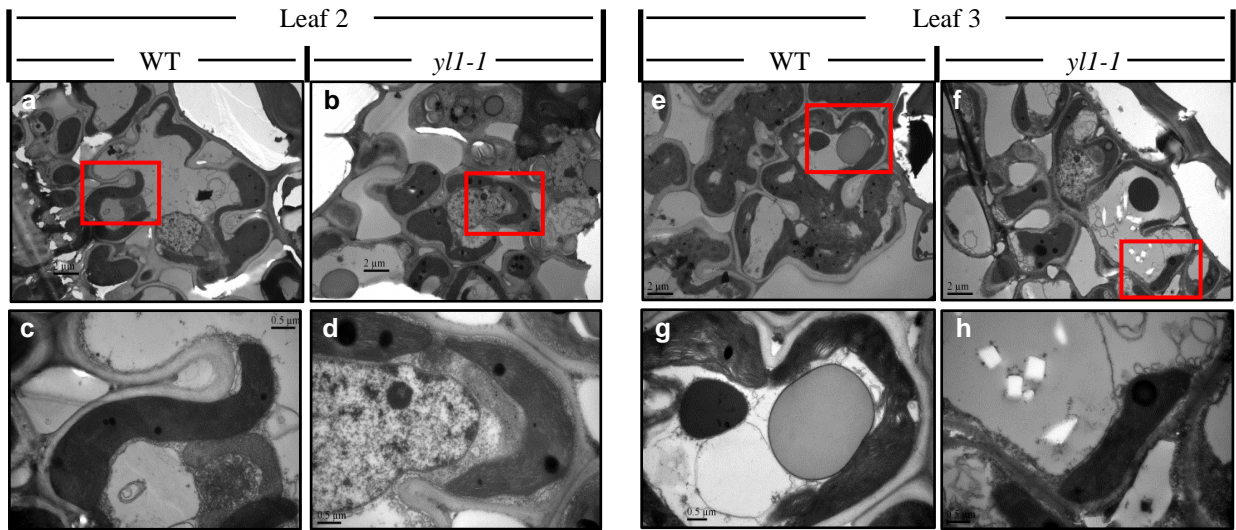

**Supplemental Figure S2.** Transmission electron microscopy (TEM) of chloroplasts from leaf 2 (a, b, c, d) and leaf 3 (e, f, g, h) of 40-day-old wild-type (WT, left) and *yll-1* (right) seedlings. Leaf 1 to Leaf 4 represent leaves from the youngest to the oldest ones. (c), (d), (g), and (h) Enlarged images of chloroplasts shown in (a), (b), (e), and (f), respectively. Bars = 2.0 μm in (a), (b), (e) and (f); and 0.5 μm in (c), (d), (g) and (h).

## Supplemental Figure S3

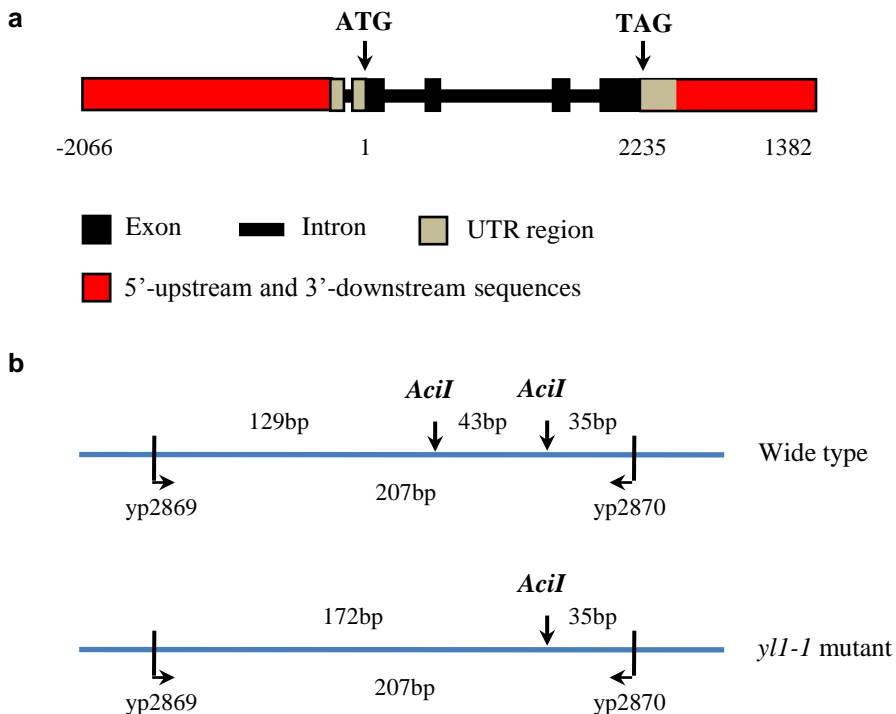

**Supplemental Figure S3.** Complementation test of YL1. (a) Schematic diagram of the complementation plasmid containing the entire *YL1* (genomic DNA). (b) Restriction enzyme map of *Acil*. An *Acil* restriction site was abolished by the C-to-T transition in mutation sequence. Primers (YP2869 and YP2870) were used to amplify a 207-bp DNA fragment around the mutation position.

## Supplemental Figure S4

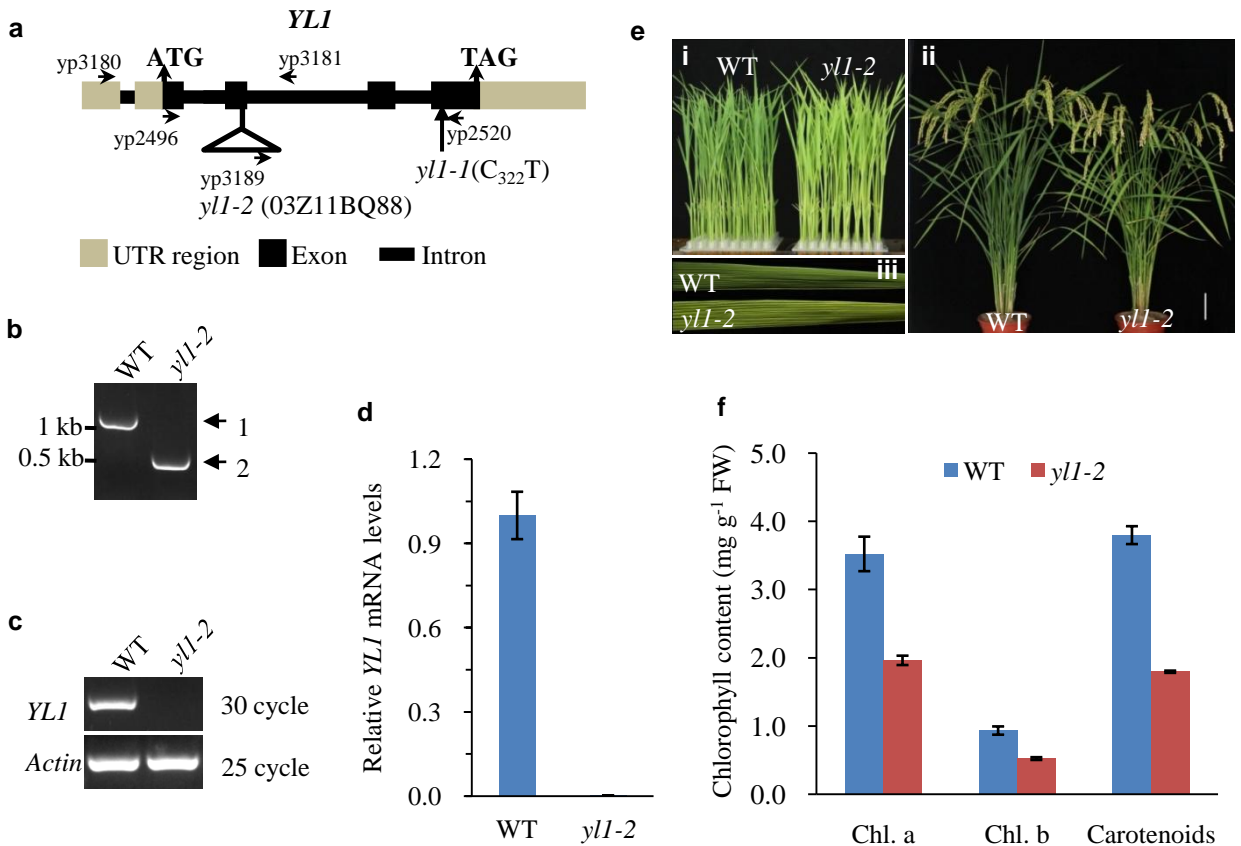

**Supplemental Figure S4. Knockout mutant *yll-2*, by T-DNA insertion, presents similar phenotype of *yll-1*.** a, Localization of T-DNA insertion site in the *YLI* gene. Exons, introns and UTR regions are indicated in black boxes, black lines and brown boxes, respectively. The triangle indicates the T-DNA insertion in *yll-2* (RMD\_03Z11BQ88). Positions of primers used in (b), (c) and (d) are indicated by arrowheads. b, PCR analysis of genomic DNA from the wild type (WT) and *yll-2* mutants confirms the homozygosity of the mutants. Band 1, amplification with primers YP3180 and YP3181; Band 2, amplification with primers YP3189 and YP3181; c and d, RT-PCR (c) and qRT-PCR (d) analysis of *YLI* expression in the wild type and *yll-2* plants. Data for WT and *yll-2* plants are presented as mean  $\pm$  SD (n = 3). e, Phenotypes of WT and *yll-2* mutant plants. (i) Phenotypes of two-week-old wild type and *yll-2* seedlings cultured in nutrition solution. (ii) Phenotypes of wild type and *yll-2* plants at grain filling stage. (iii) Enlarged views of flag leaves from (ii). f, Pigment contents in two-week-old leaves in wild type and *yll-2* mutant. Chl.a, Chlorophyll a; Chl.b, chlorophyll b. Data are means  $\pm$  SD (n = 5).

# Supplemental Figure S5

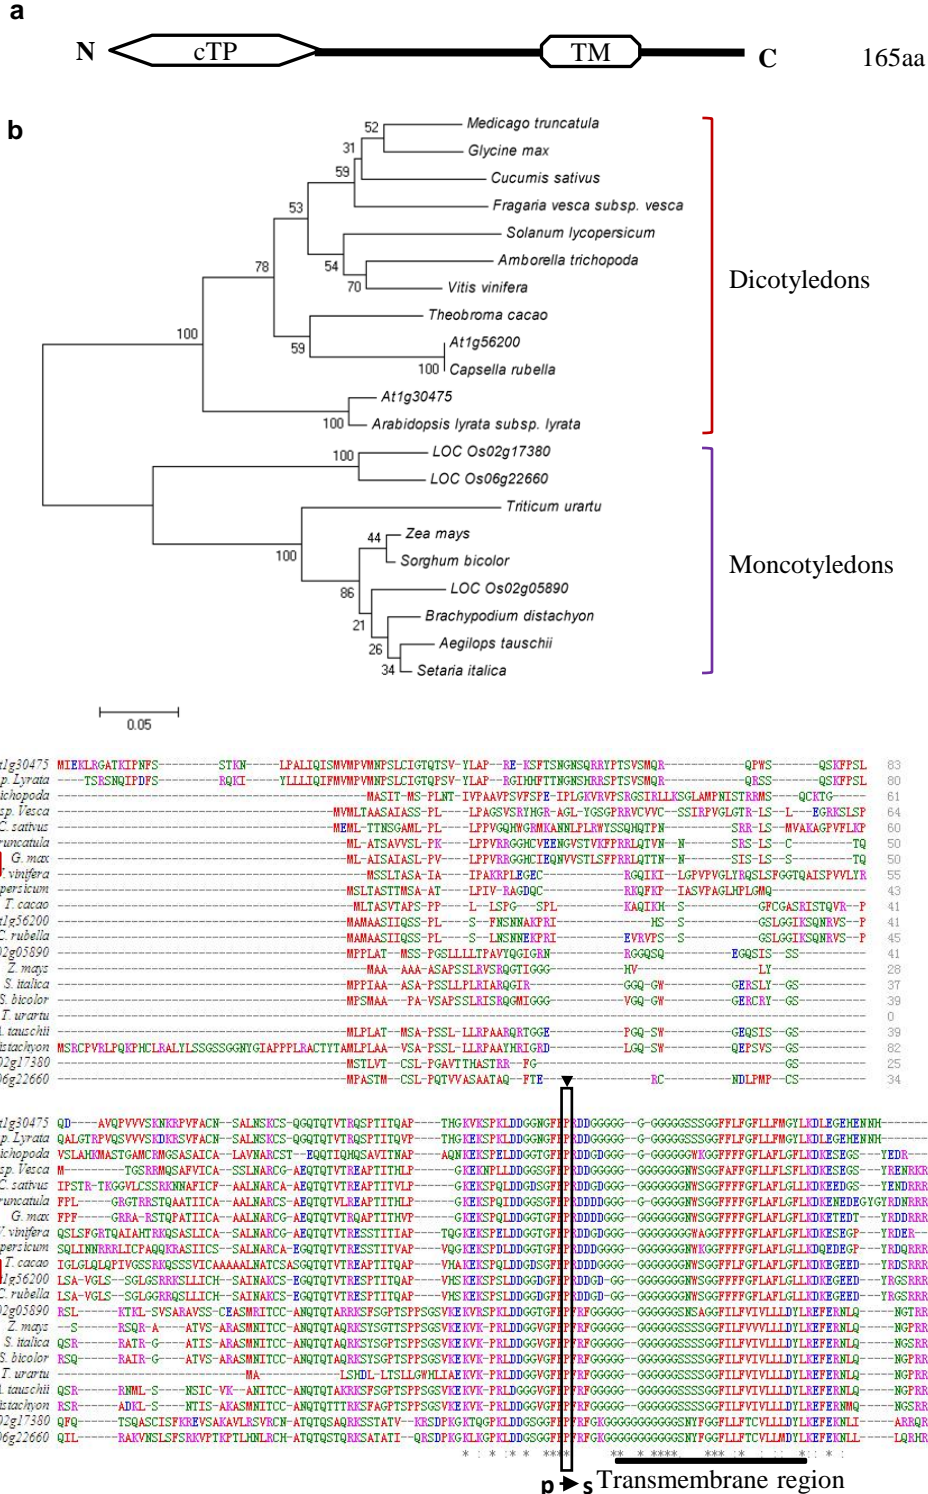

**Supplemental Figure S5.** Sequence analysis and phylogenetic tree of YL1 homologs. a, Schematic representation of the predicted protein structure of YL1. cTP, chloroplast transit peptide; tm, transmembrane domain. b, Phylogenetic analysis of YL1 and its homologous proteins. Amino acid sequences of YL1 orthologous proteins were analyzed using MEGA5 software (version 5.05) with neighbor-joining method. The numbers at the nodes represent percentage bootstrap values based on 1,000 replications. YL1 (LOC\_Os02g05890) is highlighted by the red box. c, Sequence alignment of YL1 and its homologous proteins. The alignment was performed using ClustalW (<http://www.ebi.ac.uk/Tools/msa/>). High and low consensus residues are shown in red and blue, respectively. Transmembrane region is predicted by TMHMM (<http://www.cbs.dtu.dk/>).

## Supplemental Figure S6

a

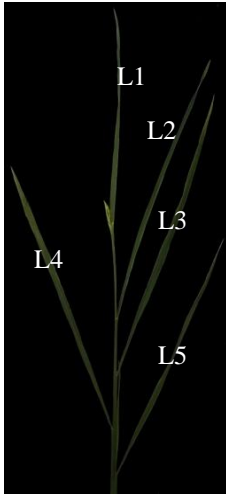

b

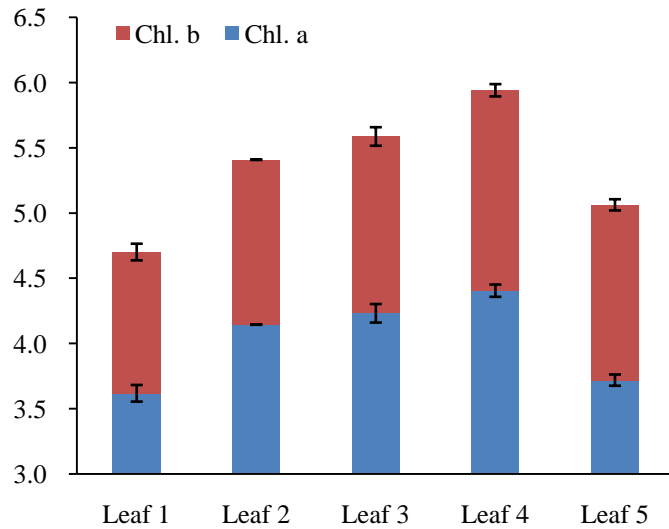

**Supplemental Figure S6.** Diagram (a) and chlorophyll contents (b) of different leaves from wild-type plants. L1 to L5 (Leaf1 to Leaf5) represent leaves from the youngest to the oldest ones in 80-day-old wild-type plants grown under field condition. Data are means  $\pm$  SD (n = 5).

## Supplemental Figure S7

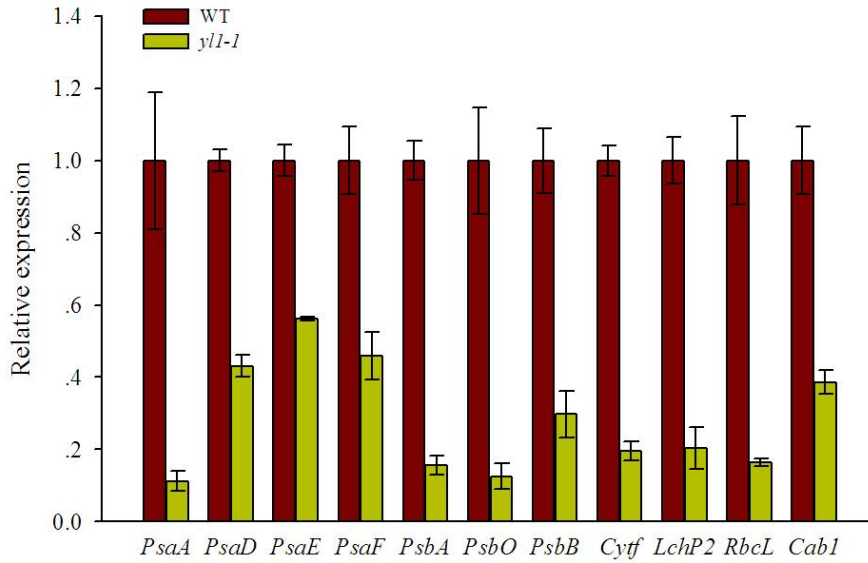

**Supplemental Figure S7.** Expression analysis of genes involved in photosynthesis in wild type (WT) and *yll-1* leaves. The relative expression level of each gene were analyzed by qRT-PCR and normalized using the Actin gene (LOC\_Os03g50885) as an internal control (mean  $\pm$  SD, n=3).



## Supplemental Figure S8

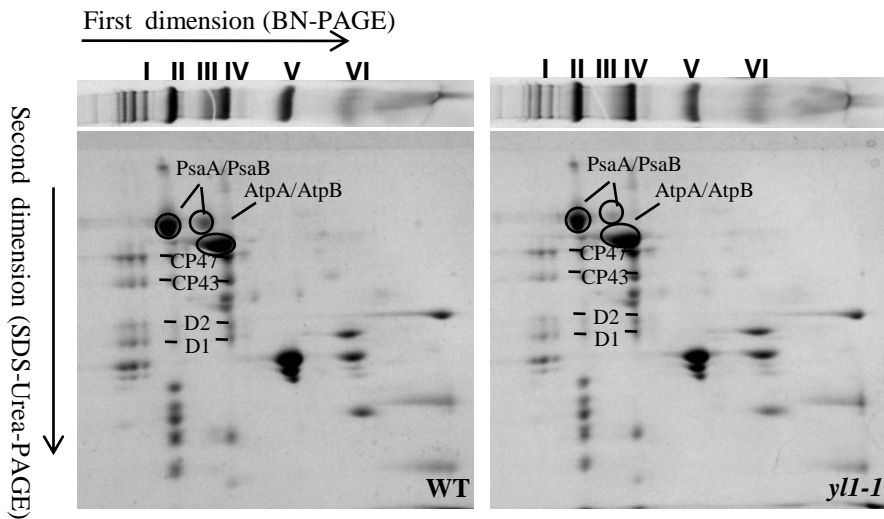

**Supplemental Figure S8.** 2D BN/SDS-PAGE fractionation of thylakoid membrane protein complexes. Thylakoid membrane proteins were extracted from leaves of 4-week-old wild type and *y11-1* mutant plants. Proteins were loaded on an equal chlorophyll content basis. I, PSI-PSII supercomplex; II, PSI-PSII dimer; III, PSI monomer; IV, CP43-less PSII core monomer; V, LHCII dimer; VI, LHCII monomer.

## Supplemental Figure S9

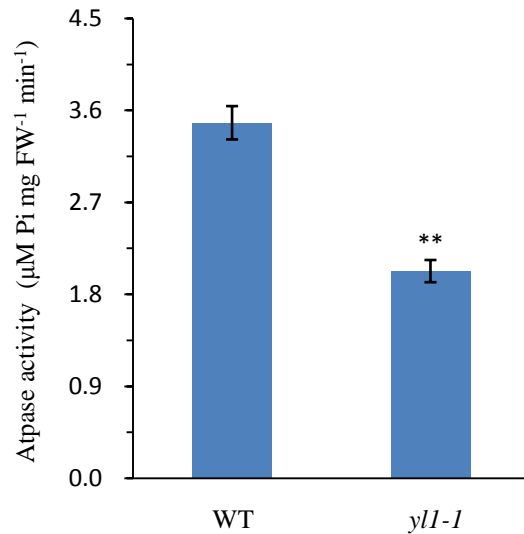

**Supplemental Figure S9.** ATPase activity in isolated chloroplasts of wild type and *yll-1* mutant plants. Intact chloroplasts were isolated from the leaves of wild type and *yll-1* mutant, and ATPase activity (equal fresh weight basis) was determined as described in Materials and Methods. Data are means  $\pm$  SD (n = 4). Asterisks indicate a statistically significant difference from the wild type (\*\*,  $P < 0.01$ ).

**Supplemental table S1.** Photosynthetic parameters in wild type and *yll-2* mutant plants.

|              | Pn<br>( $\mu\text{mol CO}_2 \text{ m}^{-2} \text{ s}^{-1}$ ) | Gs<br>( $\text{mol CO}_2 \text{ m}^{-2} \text{ s}^{-1}$ ) | Tr<br>( $\text{mol CO}_2 \text{ m}^{-2} \text{ s}^{-1}$ ) |
|--------------|--------------------------------------------------------------|-----------------------------------------------------------|-----------------------------------------------------------|
| Wide type    | $20.6 \pm 0.28$                                              | $0.65 \pm 0.06$                                           | $7.44 \pm 0.23$                                           |
| <i>yll-2</i> | $15.0 \pm 0.26^{**}$                                         | $0.31 \pm 0.03^{**}$                                      | $4.92 \pm 0.30^{**}$                                      |

Data are presented as means  $\pm$  SD (n = 6). The asterisk indicates significant difference between the wild type and *yll-1* mutant (Student's t-test, \*\*, p < 0.01). Chl, chlorophyll; Pn, net photosynthetic rate; Gs, stomatal conductance; Tr, transpiration rate.

**Supplemental Table S2.** A list of primers used in this study.

| Primer name                    | Forward primer              |
|--------------------------------|-----------------------------|
| Map-based cloning              |                             |
| RM7562-F                       | AGACATGCCAATGTGATGGC        |
| RM7562-R                       | TCGGTAGTATGGGGCTTGTC        |
| RM3703-F                       | GAGAGAGAGGGAAGGGAAGG        |
| RM3703-R                       | GCTCCCCGACATTTAAACTG        |
| YP1957-F                       | ATTCTCTACATGGTTGATTT        |
| YP1957-R                       | TTGTCCGTCTCCGAATCGCT        |
| YP1959-F                       | ATGCTTGATTCGCCATGCTAC       |
| YP1959-R                       | CTAGGAGATATTTGTAGCTA        |
| YP2033-F                       | AGGTGCGTTCCTTCGCTCGAT       |
| YP2033-R                       | GCCTCTGATTCAAGAATCACT       |
| YP1963-F                       | ACAATAGCGTAGTACTACCA        |
| YP1963-R                       | GAGGCAGAGATGAAGCTGCA        |
| YP2039-F                       | AGCGTAGTACTACCATGTACT       |
| YP2039-R                       | CATTGCATTGCAACACAGAT        |
| RM3495-F                       | ACTCTCTAAACTGGAGCAAT        |
| RM3495-R                       | CTTGATGCCTAATCTAATCC        |
| YP1755-F                       | AATCCGATCGTACGAGCAAC        |
| YP1755-R                       | GACAAGGGAAGGAAACCCTC        |
| RM279-F                        | GCGGGAGAGGGATCTCCT          |
| RM279-R                        | GGCTAGGAGTTAACCTCGCG        |
| YP2344-F                       | TCTCACTCACGTGGACTCT         |
| YP2344-R                       | CTCACCTAGGCTTTGATAT         |
| YP2392-F                       | GACGTTGAAGACAAGCCTC         |
| YP2392-R                       | AGGGAGAAGGCATGGCTTAC        |
| YP2869-F                       | CACTGCATTTGCTCACAGT         |
| YP2870-R                       | ACGAACAGGATGAATCCACC        |
| <i>yJ1-2</i> mutant genotyping |                             |
| YP3180-F                       | CATCTTCTTCTCTCCTGCGG        |
| YP3181-R                       | GAATATGCAAGGAGCGCTTC        |
| YP3189-F                       | ATAGGGTTTCGCTCATGTGTTGAGCAT |
| Quantitative real time PCR     |                             |
| YL1-F (YP2496)                 | ATGCCTCCACTTGCCACAAT        |
| YL1-R (YP2520)                 | CACGAACAGGATGAATCCAC        |
| V1-F                           | AGAATCAGCGCGAGAAGAGAACCT    |
| V1-R                           | TACACCAGCTTTGGAGGAGCTGAA    |
| V2-F                           | AGCAGATCCGTGATTACATGGCGA    |
| V2-R                           | TGCCTCTTCACTCTCTGCAACCAA    |
| V3-F                           | AACGAGAGATCTGGGCTGAATGCT    |
| V3-R                           | CTCTCATTAACATGTGTTGC        |
| RpoA-F                         | TAGATGCTGTATCCATGCCT        |

|           |                           |
|-----------|---------------------------|
| RpoA-R    | CTCTTCCTCCGTGTGAAGAA      |
| OsSig2A-F | AGTCTTATGGCATCTTGAGTG     |
| OsSig2A-R | GACCGTTCTTCTTTGAGG        |
| Rps15-F   | AGATACGGAGACTTGCTTCA      |
| Rps15-R   | GCTCCCTAATATCCAAGTACT     |
| RpoTP-F   | AAGCAGACAGTGATGACATC      |
| RpoTP-R   | ATCTTTGCACAATCACCAAG      |
| Cab1-F    | CCGGAGACGTTCCGCAAGA       |
| Cab1-R    | ATGAGCACCACTGCACCG        |
| RbcL-F    | CTTGGCAGCATCCGAGTAA       |
| RbcL-R    | TGTTAGTAACAGAACCCTCT      |
| PsaA-F    | TAGCCTGGTTCCAAGACGTA      |
| PsaA-R    | TTTGGACCAATTC AAGGTGA     |
| PsbA-F    | AGAGACGCGAAAGTACAAGC      |
| PsbA-R    | AAGTTGCGGTCAATAAGGTA      |
| LchP2-F   | GAAGgAGATCAAGAACGGCC      |
| LchP2-R   | TTGCCGGGGACGAAGTTGGT      |
| PsbB-F    | ATGGGTTTGCCTTGGTATCGT     |
| PsbB-R    | CTCCACATTGGATCCAGAACAGG   |
| PsbO-F    | CGAGTCCAGAAGACCAAGC       |
| PsbO-R    | GTGGCGACCAGATTCTTGAT      |
| CytF-F    | GGTCTATAATGCAACGTCAACAGGT |
| CytF-R    | CCTTGAACGCGTAATGGATCCTG   |
| Actin-F   | CATCTTGGCATCTCTCAGCAC     |
| Actin-R   | AACTTTGTCCACGCTAATGAA     |

---

Complementation Construct

---

|         |                            |
|---------|----------------------------|
| pCYL1-F | tctagaAGTCCCATGTAAATAGGGTC |
| pCYL1-R | gtcgacGCTTCTCGGATAACGACTCT |

---

Gus Staining

---

|        |                            |
|--------|----------------------------|
| pGUS-F | ggtaccAGTCCCATGTAAATAGGGTC |
| pGUS-R | ccatggGATATGCAGCAGCTGTGTAG |

---

GFP Assay

---

|           |                            |
|-----------|----------------------------|
| YL1-GFP-F | gagctcATGCCTCCACTTGCCACAAT |
| YL1-GFP-R | gtcgacTTGGGGAGCGAGCCCATTGT |

---

Yeast Two-Hybrid Assay

---

|        |                                       |
|--------|---------------------------------------|
| YL1-F  | catatgATGCCTCCACTTGCCACAAT            |
| YL1-R  | g gatcccTTGGGGAGCGAGCCCATTGT          |
| PsaA-F | gaattcTTGGCGGGTCTCTTTGTATGTC          |
| PsaA-R | gagctcCTATCCTACTGCAATAATTCTCGCTAAG    |
| AtpA-F | catatgTTGAACTTCTACTTTCCTTTAGAATTTAGGC |
| AtpA-R | ctgcagTTATGTTTGTTCCTGAAGGGAAAACC      |
| AtpB-F | catatgATGAGAACCAATCTACTACTTCTCG       |
| AtpB-R | g gatccTCATTTCTTCAATTTGTTCTCCTCTTCT   |
| CytF-F | catatgTTGGACATGGAAAATAGAAATACTT       |

Cytf-R                      ctgcagCTAGAAATTCATTTTCGTACAATTGAAC

---

BiFC assay

---

YL1-F                      ggatccATGCCTCCACTTGCCACAAT

YL1-R                      gtcgacTTGGGGAGCGAGCCCATTGT

YL1<sub>CDS285</sub>-R              gtcgacCCTCACTTCTCTTTAACTGAC

YL1<sub>CDS286</sub>-F              ggatccAGTCCAAAGCTTGACGATGG

AtpB-F                     ggatccATGAGAACCAATCCTACTACTTCT

AtpB-R                     ggtaccTTTCTTCAATTTGTTCTCCTCTTCT

---
